# Supplementary material
Source: PubMed Central journal article supplement (PMC7474693)
Supplement: pnas.2008111117.sapp.pdf [file pnas.2008111117.sapp.pdf]

# PNAS

[www.pnas.org](http://www.pnas.org)

Supplementary Information for

Structural basis for amino acid exchange by a human heteromeric amino acid transporter

Di Wu<sup>1</sup>, Tamara N. Grund<sup>1</sup>, Sonja Welsch<sup>2</sup>, Deryck J. Mills<sup>3</sup>, Max Michel<sup>1</sup>, Schara Safarian<sup>1\*</sup>,  
Hartmut Michel<sup>1\*</sup>

\*Corresponding authors: Hartmut Michel and Schara Safarian

Email: [Hartmut.Michel@biophys.mpg.de](mailto:Hartmut.Michel@biophys.mpg.de); [Schara.Safarian@biophys.mpg.de](mailto:Schara.Safarian@biophys.mpg.de)

**This PDF file includes:**

Figures S1 to S12  
Tables S1 to S2  
Legends for Movies S1 to S2

**Other supplementary materials for this manuscript include the following:**

Movies S1 to S2

**Fig. S1.**

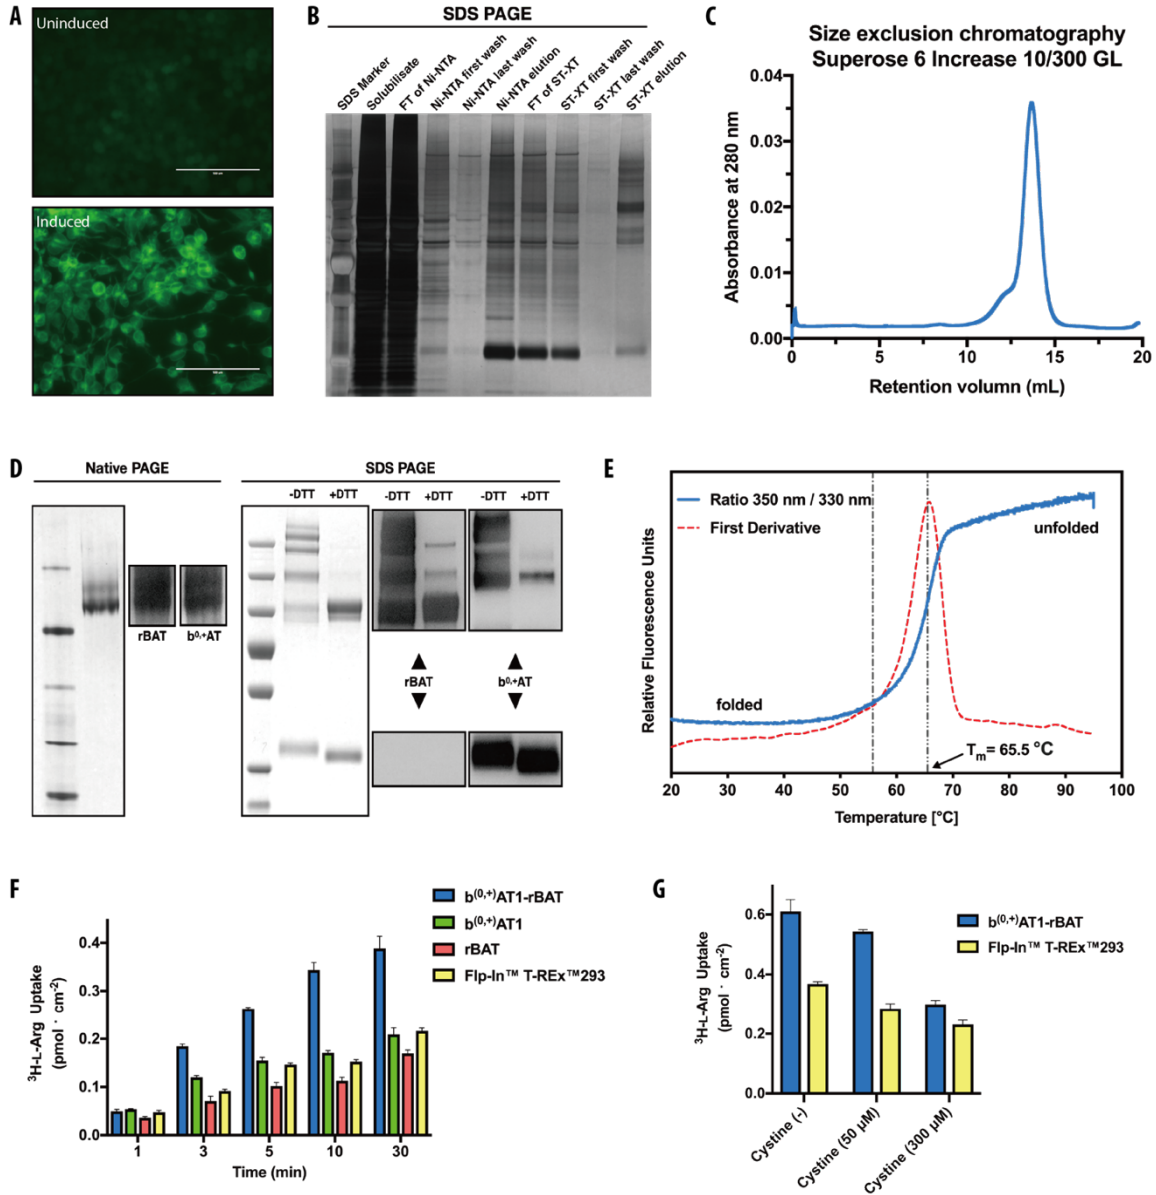

**Fig. S1. Sample preparation and validation.** (A) Fluorescence micrographs of uninduced and induced Flp-In™ T-REx™293-b(0,+)-AT1-eGFP-rBAT cells. The results confirmed the successful production and trafficking to the plasma membrane. (B) SDS PAGE analyses of fractions from the tandem affinity purification procedure. (C) SEC profile of purified b(0,+)-AT1-rBAT complex. (D) Native PAGE and Western immunoblotting results from the peak fraction of the SEC run. Samples subjected to electrophoresis were additionally treated with 10 mM DTT to confirm the inter-subunit disulfide bond. (E) DSF profile and T<sub>m</sub> value of purified b(0,+)-AT1-rBAT complex indicate for a

stable complex preparation. The measured  $T_m$  is  $65.5 \pm 0.1$  °C. Data is mean  $\pm$  SD, n = 5 replicates.

**(F)** Cell based uptake assay of 50  $\mu$ M L-[ $^3$ H]Arginine (54.5 Ci/mmol, 0.5 Ci/well) using different cell lines

**(G)** Cell based competition assay of 50  $\mu$ M L-[ $^3$ H]Arginine (54.5 Ci/mmol, 0.5 Ci/well) with varying concentrations of cystine using different cell lines. Data in **(F)** and **(G)** are mean  $\pm$  SEM. n = 3 replicates. The results confirm the activity of the heterologously produced b<sup>(0,+)</sup>AT1-rBAT complex.

Fig. S2.

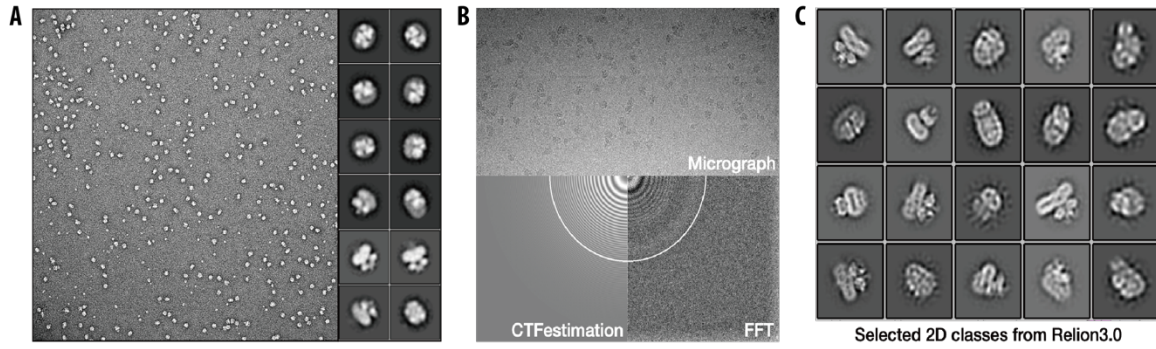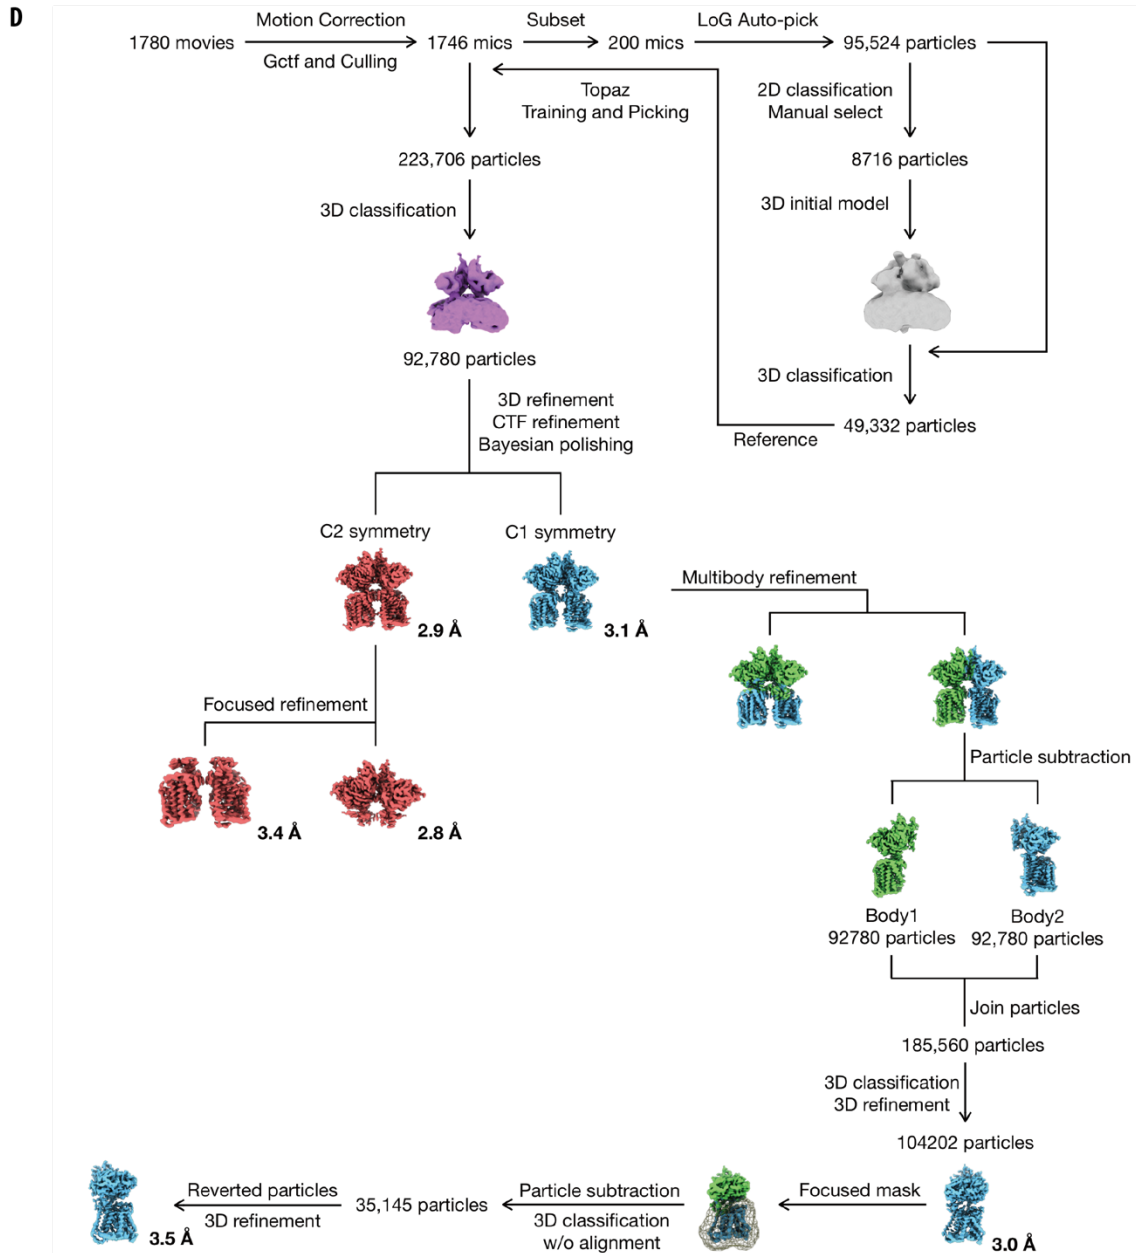

**Fig. S2. Cryo-EM data processing workflow.** (A) Exemplary micrograph and 2D class averages from an initial negative staining EM experiment. (B) Exemplary micrograph and CTF estimation (Gctf) of the cryo-EM dataset. (C) 2D class averages from the cryo-EM dataset. (D) Schematic workflow of pre-processing, classification and refinement of cryo-EM data (see Supplementary Methods for details). Different processing approaches are indicated by color. Reported resolution values correspond to FSC = 0.143.

Fig. S3.

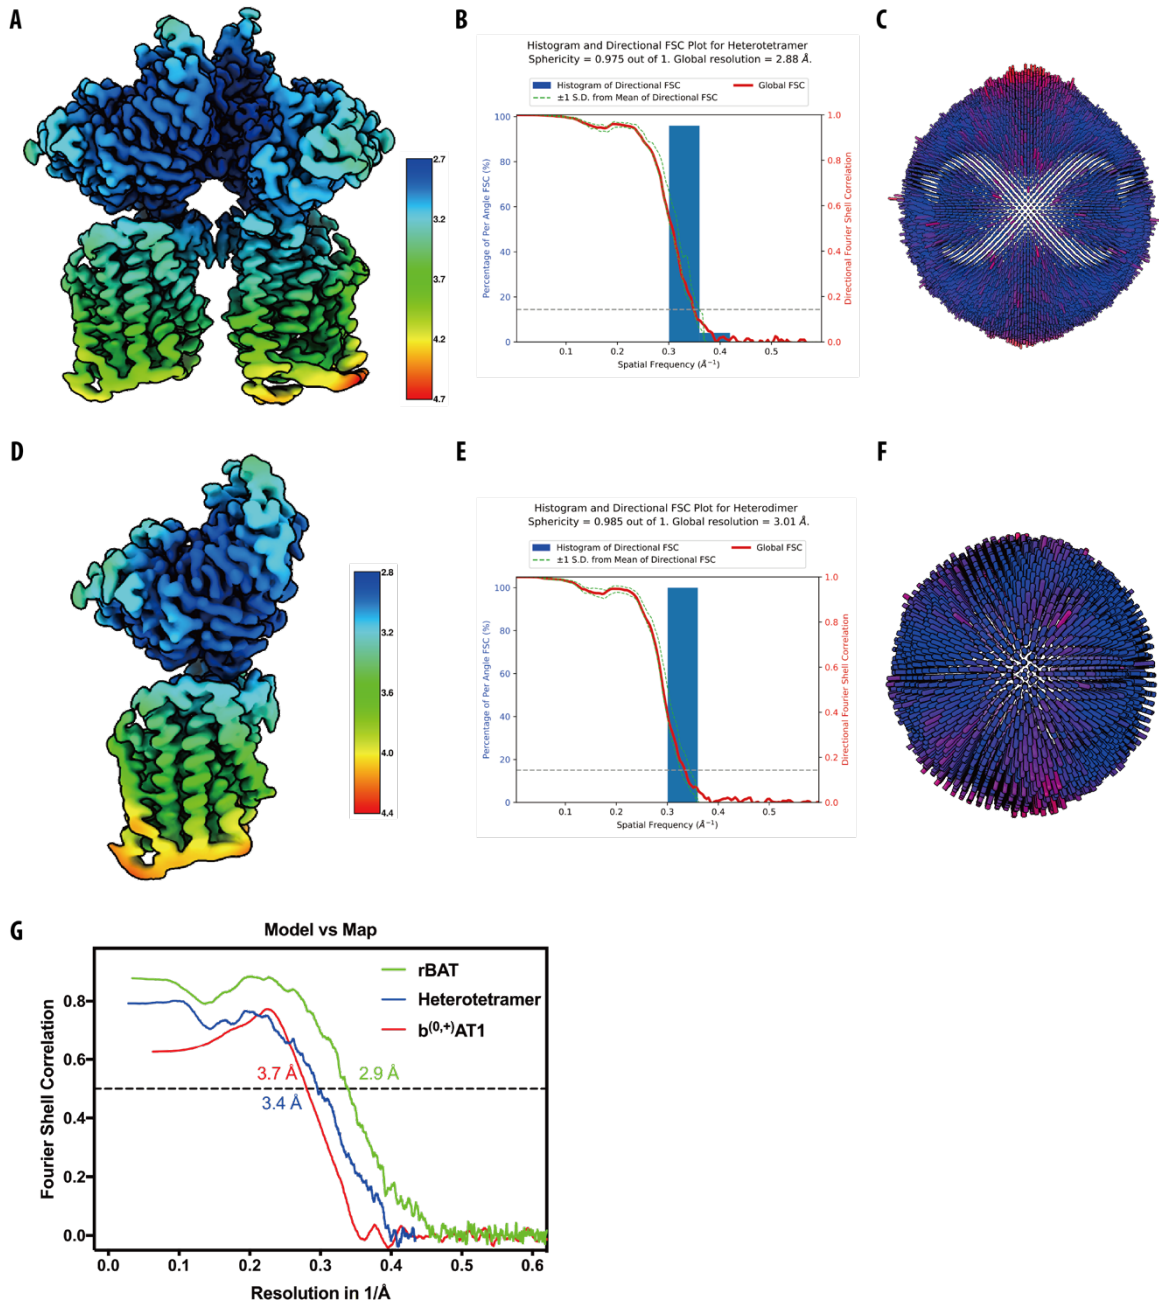

**Fig. S3. Map quality analysis of the b<sup>(0,+)</sup>AT1-rBAT structure. (A)** Local resolution map of the heterotetrameric b<sup>(0,+)</sup>AT1-rBAT complex with corresponding **(B)** 3DFSC plot, and **(C)** Euler angle distributions. **(D)** Local resolution map of the heterodimeric b<sup>(0,+)</sup>AT1-rBAT complex with corresponding **(E)** 3DFSC plot, and **(F)** Euler angle distributions. **(G)** Map-to-model correlation curve of maps from three different focused refinement jobs.

Fig. S4.

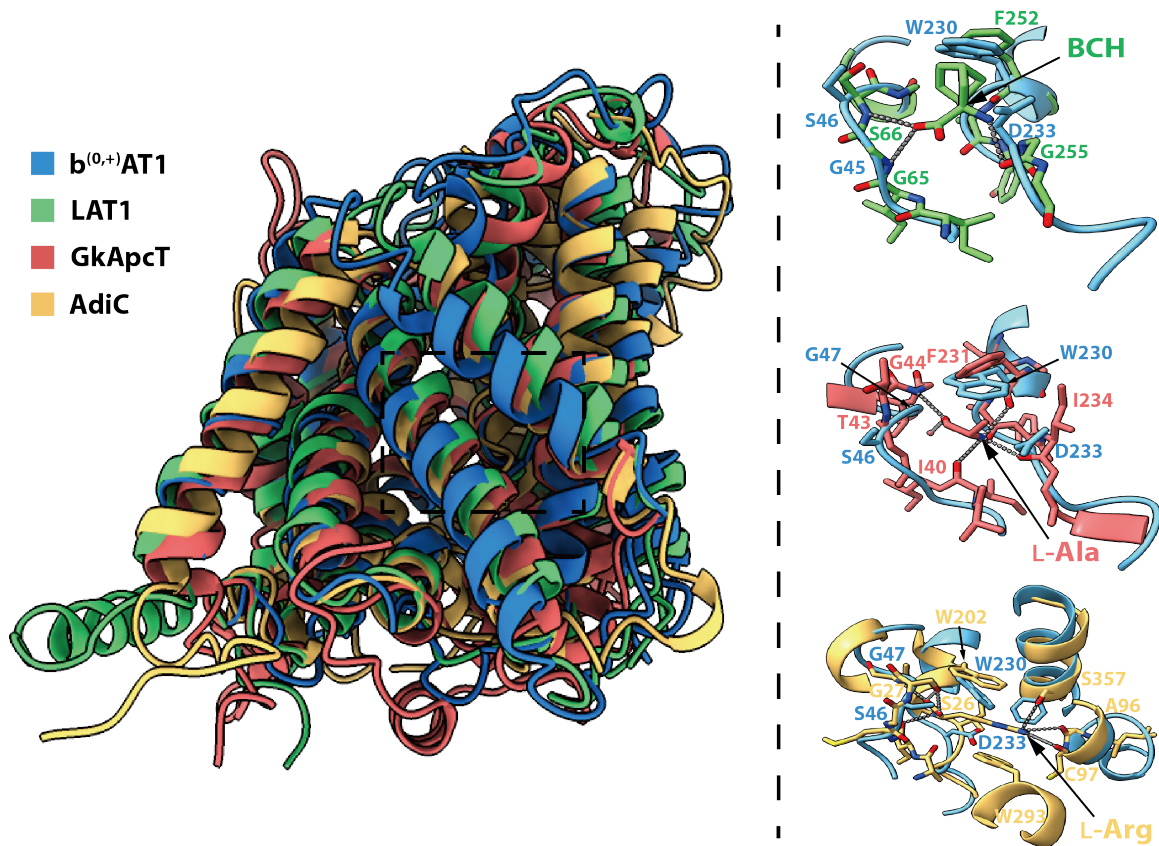

**Fig. S4. Comparison of overall conformation and substrate-binding sites between  $b^{(0,+)}\text{AT1}$ , LAT1, GkApcT and AdiC.** The overall structure of  $b^{(0,+)}\text{AT1}$  was captured in an inward-facing conformation. Its overall fold resembles that of LAT1, GkApcT and AdiC. The putative binding pocket of  $b^{(0,+)}\text{AT1}$  is characterized by a local environment which is common among SLC7 family amino acid transporters. LAT1 (PDB 6IRT), GkApcT (PDB 5OQT) and AdiC (PDB 3L1L) are colored green, red and yellow, respectively.

Fig. S5.

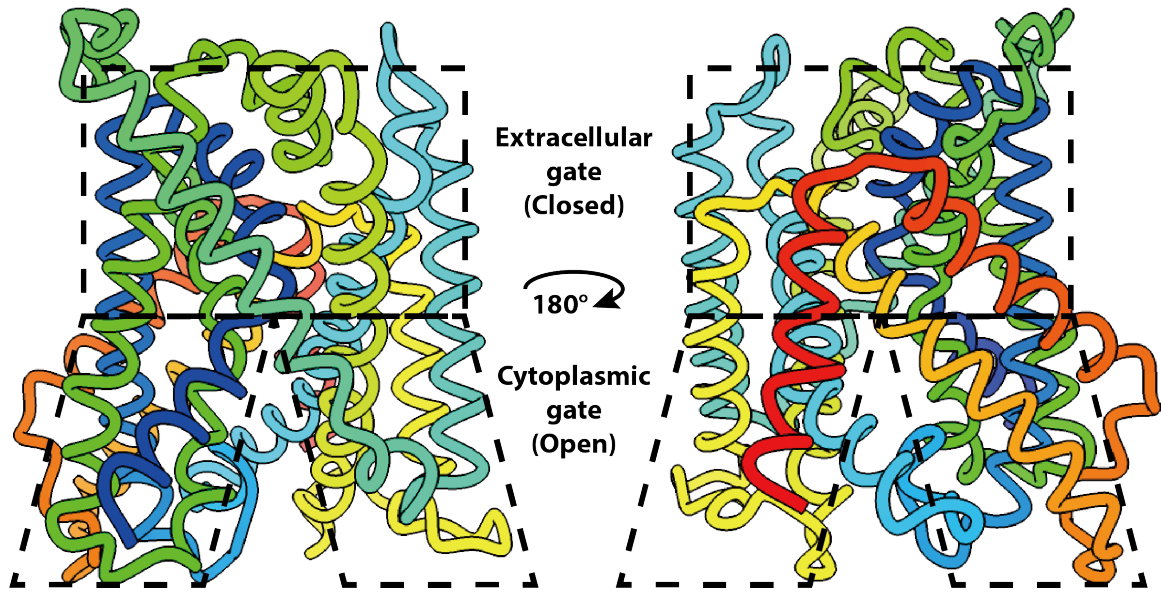

Fig. S5. The inward-facing conformation of b<sup>(0,+)</sup>AT1. Schematic illustration of extracellular and cytoplasmic barriers of b<sup>(0,+)</sup>AT1 in the inward-facing conformation.





Fig. S7.

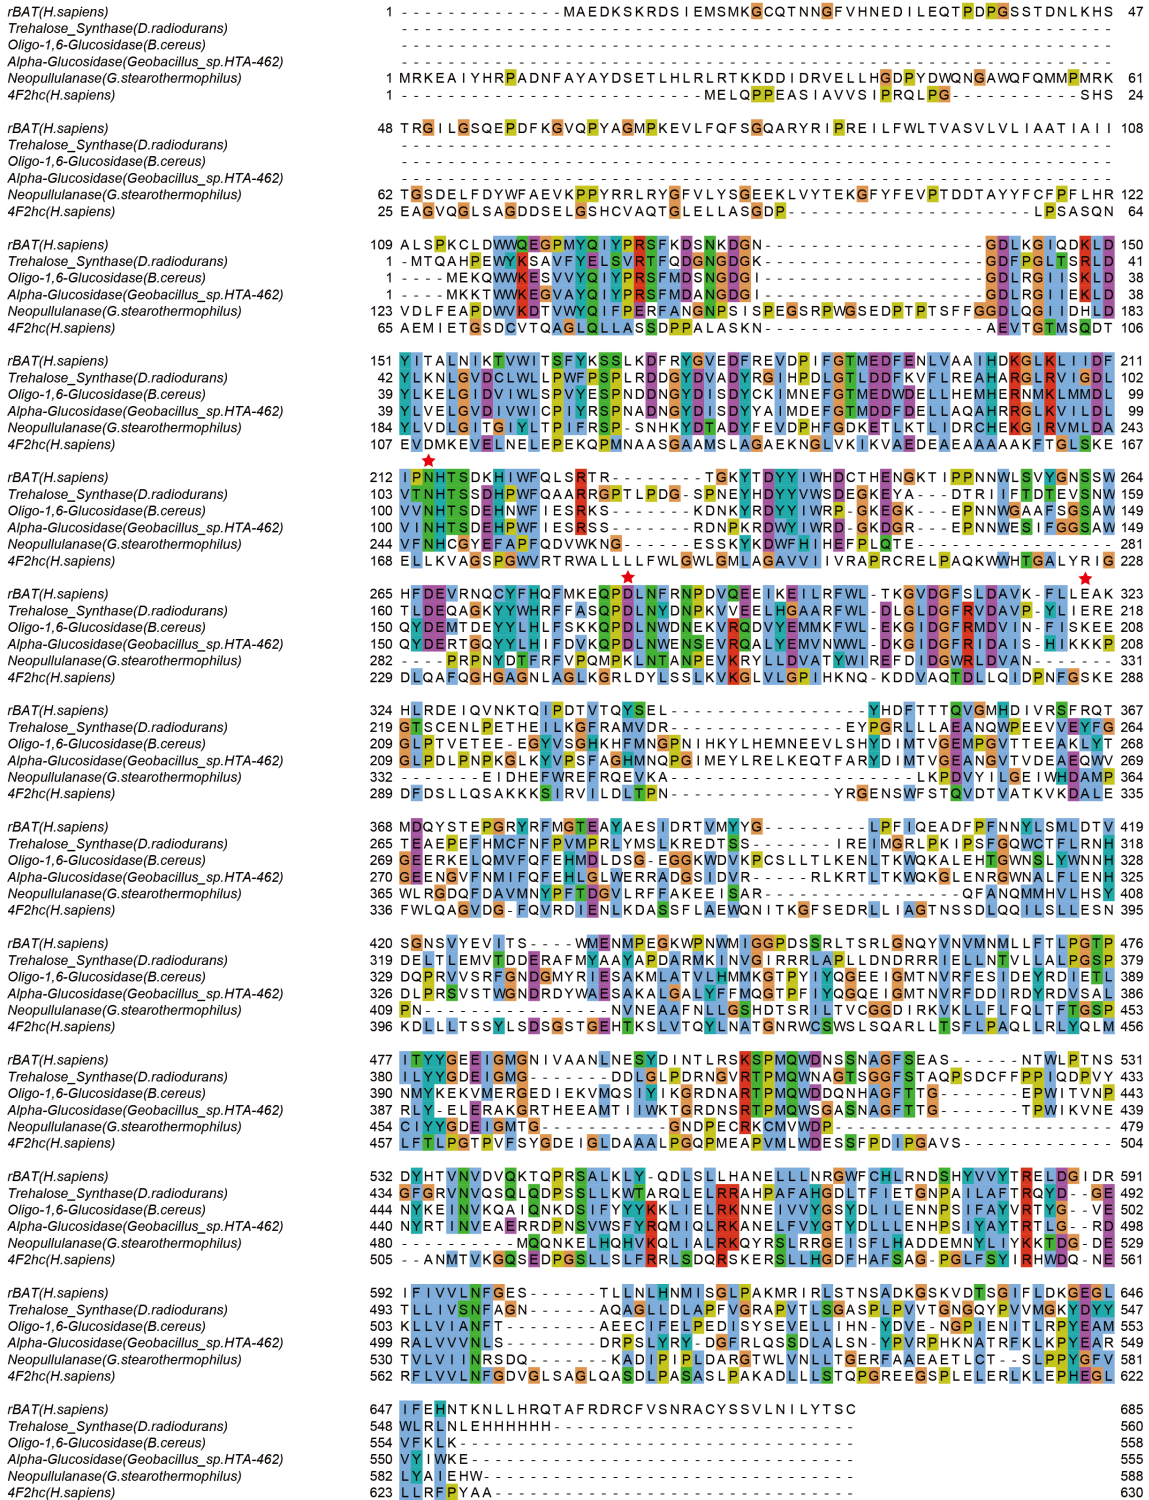

Fig. S7. Full length sequence alignment of human rBAT, 4F2hc and GH13  $\alpha$ -amylase family members. Red stars indicate conserved residues participating in Ca<sup>2+</sup> binding and coordination.

Fig. S8.

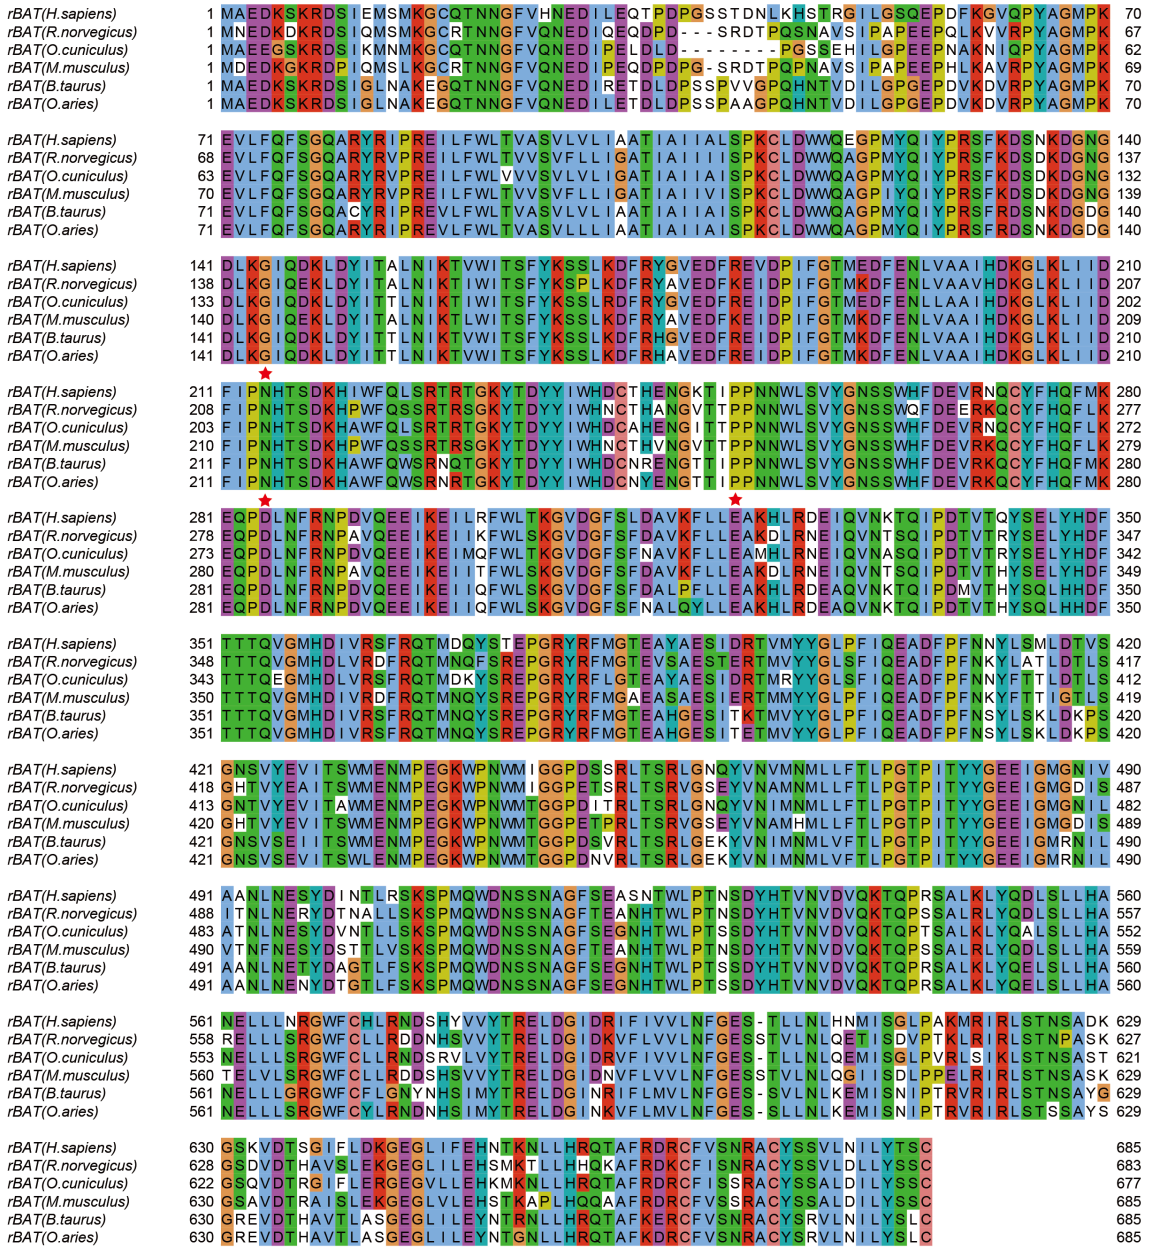

Fig. S8. Full length sequence alignment of mammalian rBAT homologs. Red stars indicate conserved residues participating in Ca<sup>2+</sup> binding and coordination.

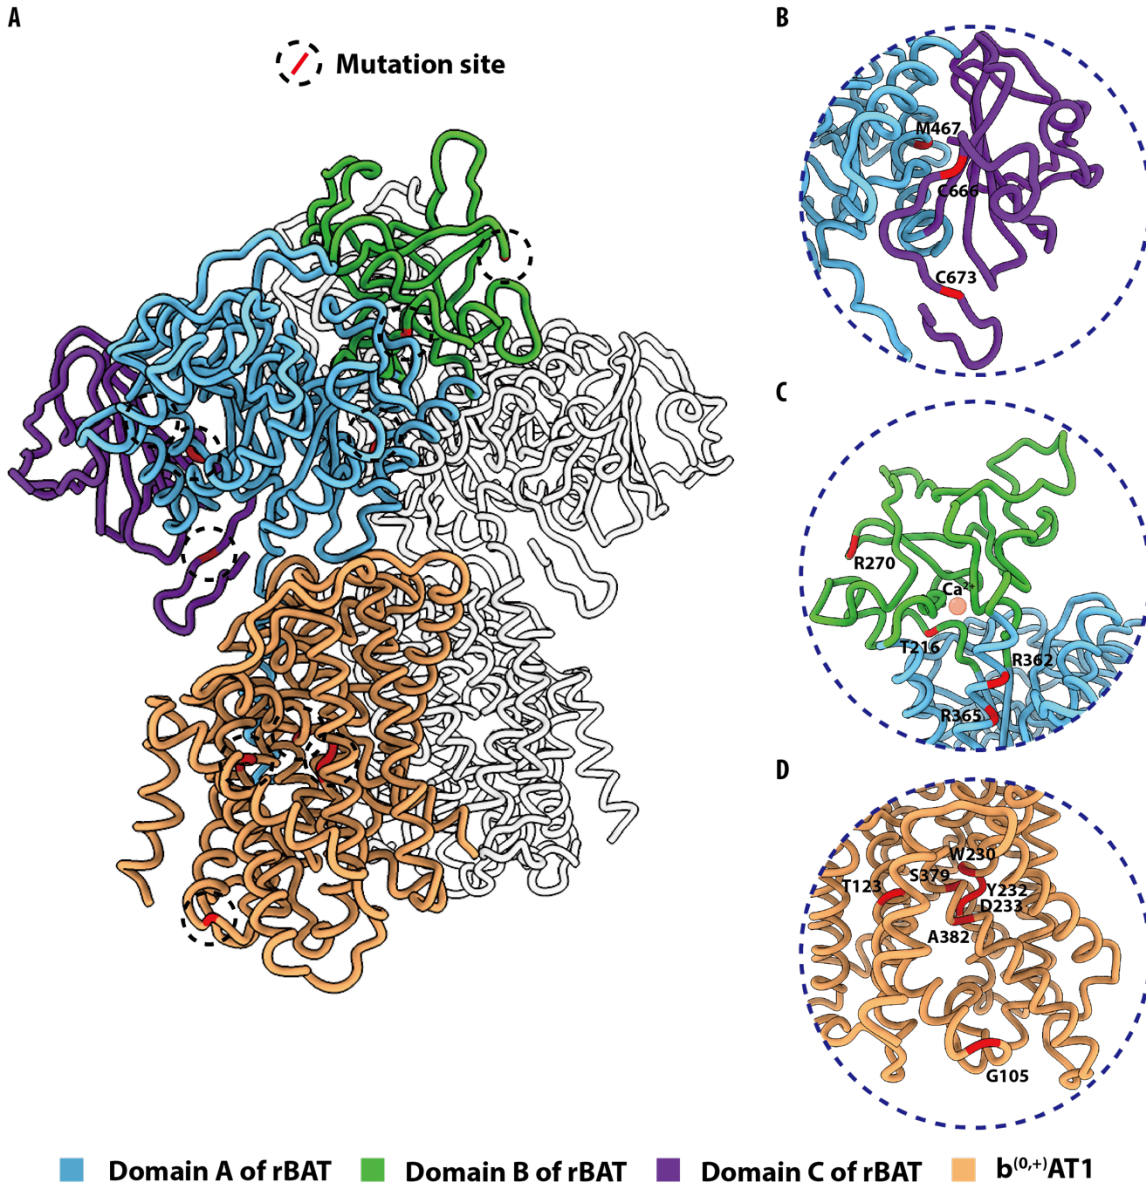

**Fig. S9. Cystinuria causative mutations of the  $b^{(0,+)}AT1$ -rBAT complex.** (A) Overall structure of the heterodimeric  $b^{(0,+)}AT1$ -rBAT complex. Locations of cystinuria-related mutations are indicated in red. (B) Closeup view of domain C mutations. The M467 mutation is found at the interface between domains B and C. Residues C666 and C673 are involved in formation of disulfide bonds within the C-loop of rBAT. (C) Closeup view of domain A and B mutations. T216 is in immediate vicinity of the  $Ca^{2+}$ -bind site. (D) Closeup view of  $b^{(0,+)}AT1$  mutations. W230 completes the substrate binding site of  $b^{(0,+)}AT1$  and acts as a gating residue. G105 locates in the IL1 at a close position to

TM3. A detailed summary of the respective mutations and their physiological effects is given in the Table. S2.

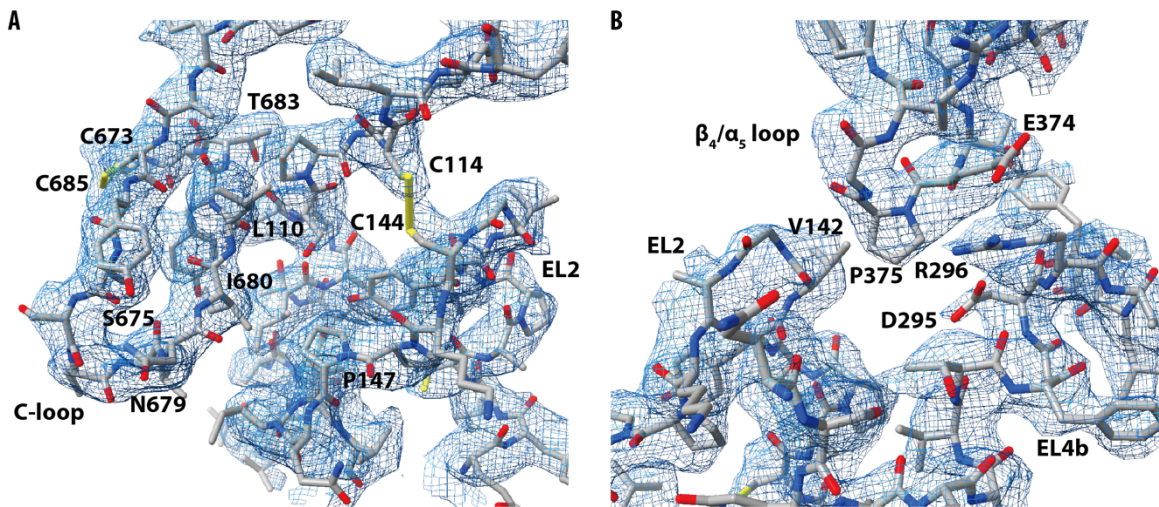

**Fig. S10. Interaction interfaces of rBAT and  $b^{(0,+)}AT1$ .** (A) Atomic model and density map of the C-terminal loop of rBAT and EL2 of  $b^{(0,+)}AT1$ . (B) Atomic model and density map of the  $\beta_4/\alpha_5$  loop of rBAT and EL2 and EL4b of  $b^{(0,+)}AT1$ . EL = extracellular loop.

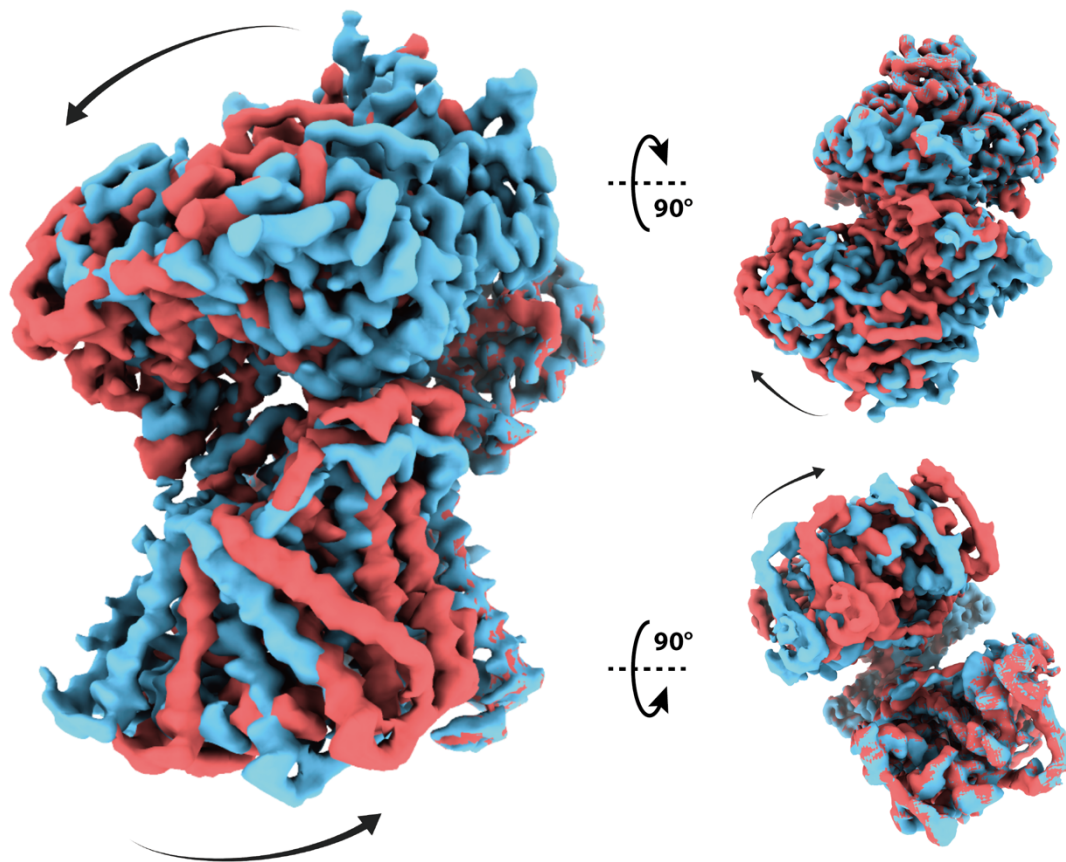

**Fig. S11. Conformational heterogeneity of the  $b^{(0,+)}\text{AT1-rBAT}$  complex revealed by principle component analysis. (A)** The most dominant component of the conformational heterogeneity is shown. We observe a relative rotational movement between the two HAT units along the membrane axis. The rotation center is found to be at the interaction interface between of the two extracellular rBAT domains. For a more comprehensive illustration of the movement see movies S1 and S2. The initial conformational is colored in blue. The highest rotational sampling angle is colored in red.

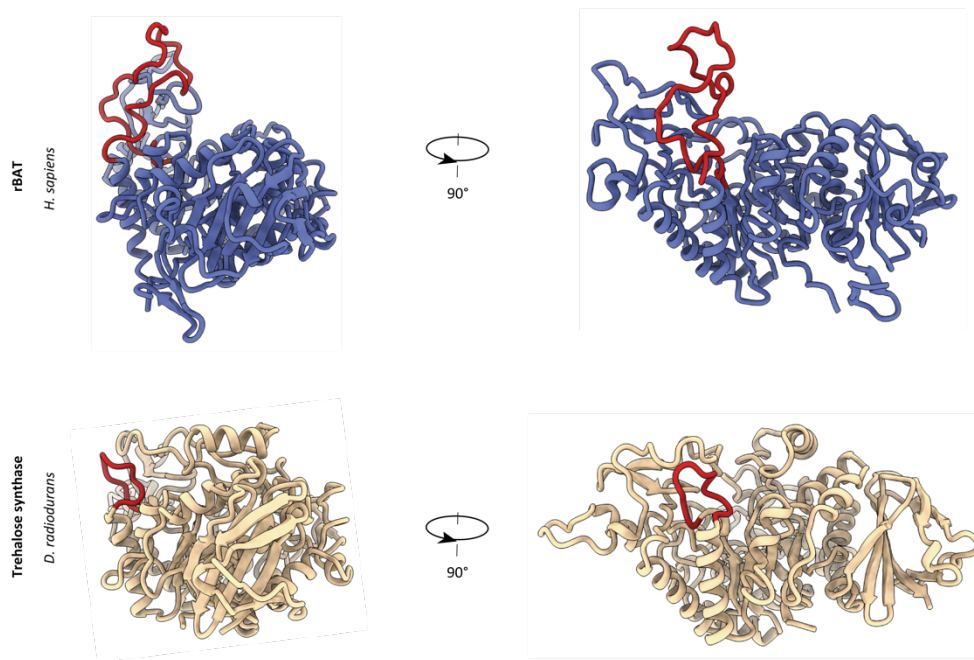

**Fig. S12. Structural comparison of the  $\beta_4/\alpha_4$  extension between human rBAT and the bacterial trehalose synthase.** Ribbon representation of the extracellular domain of human rBAT and the trehalose synthase from *D. radiodurans* (PDB 4TVU). The  $\beta_4/\alpha_4$  extensions of the two structures highlighted in red indicate that the rBAT domain possesses a larger loop segment than the rehalose synthase. Despite the structural resemblance between rBAT and the trehalose synthase, the bacterial member of the glycoside hydrolase (GH13) family is lacking critical residue required for dimer formation.



**Table S1. Cryo-EM data collection, refinement and validation statistics**

|                                                  | rBAT<br>(homodimer) | b <sup>(0,+)</sup> AT1 | b <sup>(0,+)</sup> AT1-rBAT<br>(heterotetramer) |
|--------------------------------------------------|---------------------|------------------------|-------------------------------------------------|
| <b>Data collection</b>                           |                     |                        |                                                 |
| Accession number                                 | EMD-10936           | EMD-10940              | EMD-10933                                       |
| Magnification                                    | 105k                | 105k                   | 105k                                            |
| Voltage / kV                                     | 300                 | 300                    | 300                                             |
| Dose / e <sup>-</sup> Å <sup>-2</sup>            | 40                  | 40                     | 40                                              |
| Pixel size / Å                                   | 0.837               | 0.837                  | 0.837                                           |
| Defocus range / μm                               | -1.1 to -2.2        | -1.1 to -2.2           | -1.1 to -2.2                                    |
| Recorded movies                                  | 1780                | 1780                   | 1780                                            |
| Initial particle images                          | 223706              | 223706                 | 223706                                          |
| Final particle images                            | 92789               | 185560                 | 92789                                           |
| Camera                                           | Gatan K3            | Gatan K3               | Gatan K3                                        |
| Microscope                                       | Titan Krios G3i     | Titan Krios G3i        | Titan Krios G3i                                 |
| <b>Image processing</b>                          |                     |                        |                                                 |
| Symmetry imposed                                 | C2                  | C1                     | C2                                              |
| Resolution (FSC <sub>0.143</sub> ) / Å           | 2.82                | 3.43                   | 2.88                                            |
| Applied B-factor / Å                             | -30                 | -10                    | -30                                             |
| Map resolution range                             | 2.7-3.7             | 3.2-4.4                | 2.7-4.7                                         |
| <b>Model refinement</b>                          |                     |                        |                                                 |
| PDB accession                                    | 6YUZ                | 6YV1                   | 6YUP                                            |
| Validation                                       |                     |                        |                                                 |
| FSC <sup>map-to-model</sup> <sub>(0.5)</sub> / Å | 2.9                 | 3.7                    | 3.4                                             |
| MolProbity score                                 | 1.95                | 1.63                   | 2                                               |
| Composition                                      |                     |                        |                                                 |
| Atoms                                            | 9782 <sup>+</sup>   | 2496 <sup>+</sup>      | 14774                                           |
| Protein residues                                 | 1188                | 328                    | 1844                                            |
| Ligands                                          | 8 NAG, 2 CA         |                        | 8 NAG, 2 CA                                     |
| Bonds (R.M.S.D.)                                 |                     |                        |                                                 |
| Length (Å)                                       | 0.005               | 0.002                  | 0.003                                           |
| Angles (°)                                       | 0.54                | 0.58                   | 0.909                                           |
| B-factors (min/max/mean)                         |                     |                        |                                                 |
| Protein                                          | 39.2/138.4/60.7     | 15.63/79.6/40.11       | 15..63/138.2/53.96                              |
| Ligand                                           | 36.71/82.83/77.06   |                        | 36.71/82.83/77.06                               |
| Clashscore                                       | 7.9                 | 9.39                   |                                                 |
| Ramachandran plot (%)                            |                     |                        |                                                 |
| Favored                                          | 95.68               | 99.04                  | 96.84                                           |
| Allowed                                          | 3.9                 | 0.96                   | 2.88                                            |
| Outliers                                         | 0.4                 | 0                      | 0.28                                            |
| Rotamer outliers (%)                             | 1.95                | 1.48                   | 1.8                                             |

**Table S2. Representatives of cystinuria-associated mutations in b<sup>(0,+)</sup>AT1 and rBAT**

| <b>Mutation</b>             | <b>Location</b>         | <b>Structural comments</b>                                            | <b>Mutation defect summary</b>                                                                                                                           |
|-----------------------------|-------------------------|-----------------------------------------------------------------------|----------------------------------------------------------------------------------------------------------------------------------------------------------|
| <b>b<sup>(0,+)</sup>AT1</b> |                         |                                                                       |                                                                                                                                                          |
| Gly105Arg<br>Gly105Glu      | IL1                     | In the IL1 region and is close to TM3                                 | Mutated charge and/or larger side chains may interfere with the conformation switches                                                                    |
| Thr123Met                   | TM3                     | In the middle of TM3 and near the binding pocket zone                 | Mutated hydrophobic side chain may form van der Waals contacts with residues from neighbour helix and affect its behaviour even the overall conformation |
| Trp230Arg                   | TM6<br>(binding pocket) | Act as occlusion gate of the binding pocket on the extracellular side | Loss of hydrophobic interaction and steric hindrance would prevent the successful transport of substrates                                                |
| Tyr232Cys                   | TM6                     | Locates right in the binding pocket zone                              | Mutated smaller side chain may result in loose packing and disrupt the substrate interaction                                                             |
| Asp233Glu                   | TM6<br>(binding pocket) | Play a crucial dual role as part of the binding pocket                | A slightly larger residue may affect the tight packing pattern of the binding pocket                                                                     |
| Ser379Arg                   | TM10                    | In the middle of TM10 and near the binding pocket                     | Mutated charge and/or larger side chain may change the size of the binding pocket and disrupt substrate interaction                                      |
| Ala382Thr                   | TM10                    | In the middle of TM10 and near the binding pocket                     | Mutated polar and/or larger side chain may change the size of the binding pocket and disrupt the substrate interaction                                   |
| <b>rBAT</b>                 |                         |                                                                       |                                                                                                                                                          |
| Thr216Met                   | Domain B                | Adjacency of Asn214 and forms hydrogen bond with Tyr237               | Loss of hydrogen bond and mutated longer residue may disrupt the stabilization of the ion binding site                                                   |
| Arg270X<br>Arg270Leu        | Domain B                | Forms hydrogen bond network along with Thr234, Gln272 and Asp241      | Arg270X: Truncated ectodomain<br>Arg270Leu: Loss of hydrogen bond network                                                                                |

|                                                  |                                         |                                                                 |                                                                                                                                                                                  |
|--------------------------------------------------|-----------------------------------------|-----------------------------------------------------------------|----------------------------------------------------------------------------------------------------------------------------------------------------------------------------------|
| Arg362Cys<br>Arg362His                           | Domain B                                | Forms charge interaction with Asp359 from another protomer      | Arg362Cys: Loss of charge interaction and may destabilize the dimerization<br>Arg362His: Shorter residue leads to weaker charge interaction and may destabilize the dimerization |
| Arg365Trp<br>Arg365Gln<br>Arg365Pro<br>Arg365Leu | TM6                                     | TIM $\alpha$ 4 in domain A                                      |                                                                                                                                                                                  |
| Met467Thr<br>Met467Lys                           | At the interface between domain A and C | Forms hydrophobic interaction network as described in main text | Met467Thr/Lys: Mutated polar and charge side chain may disrupt hydrophobic interactions network                                                                                  |
| Cys666Trp                                        | C-terminus loop                         | Forms disulfide bond with Cys571                                | Loss of disulfide bond and may destabilize the c-terminus which also participates in the interaction with b <sup>(0,+)</sup> AT1                                                 |
| Cys673Trp<br>Cys673Arg                           | C-terminus loop                         | Forms disulfide bond with Cys685                                | Loss of disulfide bond and may destabilize the c-terminus which also participates in the interaction with b <sup>(0,+)</sup> AT1                                                 |

---

**Movie S1 (separate file). Principle components of multibody analyses (part I)**

Repositioning of the reconstructed body densities along three major motion for the heterotetrameric complex reveals the flexibility of the TMH domain over the extracellular domain. Soft masks for extracellular domain and TMH domain were applied for conducting this multibody refinement.

**Movie S2 (separate file). Principle components of multibody analyses (part II)**

Repositioning of the reconstructed body densities along three major motion for the heterotetrameric complex reveals the flexibility between two heterodimeric subunits. Soft masks for heterodimeric bodies were applied for conducting this multibody refinement.
